# Supplementary material
Source: Research Square preprint supplement (doi:10.21203/rs.3.rs-9016562/v1)
Supplement: Supplementary file 1 [file 9171c4c0aeb427837263ae24.docx]

**Supplementary material**

**Supplementary File 1 -** **QualiComp Questionnaire**

QualiComp Questionnaire – Quality Improvement Competencies

Matrix version (Likert 1–5) for replication in studies.

Instrument Description

**QualiComp** is a questionnaire for assessing **competencies in quality improvement** in healthcare, organized into three dimensions: (i) Attitudes (A1–A4), (ii) Technical Skills (T1–T19), and (iii) Behavioral Skills/Soft Skills (S1–S7). This appendix presents the matrix version of the instrument, the response format, scoring criteria, and a brief technical glossary. Development and validation evidence is available in the main article.

Response Format and Scale

5-point Likert scale, with one response per item: 1 = Strongly disagree; 2 = Disagree; 3 = Neither agree nor disagree; 4 = Agree; 5 = Strongly agree. Higher scores indicate greater perceived mastery.

Complete Instrument

Section 1 — Attitudes toward Quality Improvement

| **Item** | **1 SD** | **2 D** | **3 N** | **4 A** | **5 SA** |
| --- | --- | --- | --- | --- | --- |
| A1. I believe that health professionals have a significant responsibility in improving the quality of services and health outcomes for the population. | ○ | ○ | ○ | ○ | ○ |
| A2. I believe that understanding variability in processes and outcomes is essential to assessing the quality of care. | ○ | ○ | ○ | ○ | ○ |
| A3. I believe that continuous quality improvement should be an essential part of the daily work of all healthcare professionals. | ○ | ○ | ○ | ○ | ○ |
| A4. I think that improving health care can increase job satisfaction. | ○ | ○ | ○ | ○ | ○ |

Section 2 — Technical Skills in Quality Improvement

| **Item** | **1 SD** | **2 D** | **3 N** | **4 A** | **5 SA** |
| --- | --- | --- | --- | --- | --- |
| T1. I can identify opportunities for improvement in healthcare. | ○ | ○ | ○ | ○ | ○ |
| T2. I know how to prioritize the most important improvement opportunities for my local context. | ○ | ○ | ○ | ○ | ○ |
| T3. I know how to analyze the causes of quality of care problems, using appropriate tools. | ○ | ○ | ○ | ○ | ○ |
| T4. I can map a healthcare process to analyze ways to optimize it. | ○ | ○ | ○ | ○ | ○ |
| T5. I know how to develop a criterion or indicator to measure the quality of health care. | ○ | ○ | ○ | ○ | ○ |
| T6. I know how to select an appropriate sample to collect data for a criterion or indicator. | ○ | ○ | ○ | ○ | ○ |
| T7. I can critically evaluate the validity of criteria or indicators used to measure quality. | ○ | ○ | ○ | ○ | ○ |
| T8. I know how to set clear goals to improve health care. | ○ | ○ | ○ | ○ | ○ |
| T9. I can design a multifaceted intervention to improve the quality of health services. | ○ | ○ | ○ | ○ | ○ |
| T10. I can test changes on a small scale before implementing them widely. | ○ | ○ | ○ | ○ | ○ |
| T11. I know how to monitor the implementation of quality improvement actions. | ○ | ○ | ○ | ○ | ○ |
| T12. I know how to disseminate improvements achieved to other similar units or services. | ○ | ○ | ○ | ○ | ○ |
| T13. I can analyze data to estimate the quality of health services. | ○ | ○ | ○ | ○ | ○ |
| T14. I know how to apply tools to identify the most common causes of quality problems. | ○ | ○ | ○ | ○ | ○ |
| T15. I can apply basic statistical analysis to identify relationships between variables. | ○ | ○ | ○ | ○ | ○ |
| T16. I can stratify the results of an indicator to identify where quality is lowest. | ○ | ○ | ○ | ○ | ○ |
| T17. I can build a baseline on trend charts (run charts) or control charts. | ○ | ○ | ○ | ○ | ○ |
| T18. I can identify “special causes” in trend or control charts. | ○ | ○ | ○ | ○ | ○ |
| T19. I can differentiate when a process is stable or unstable based on data. | ○ | ○ | ○ | ○ | ○ |

Section 3 — Soft Skills

| **Item** | **1 SD** | **2 D** | **3 N** | **4 A** | **5 SA** |
| --- | --- | --- | --- | --- | --- |
| S1. I have the ability to select the appropriate profile of participants for an improvement team. | ○ | ○ | ○ | ○ | ○ |
| S2. I have the ability to define responsibilities within an improvement team. | ○ | ○ | ○ | ○ | ○ |
| S3. I have the ability to facilitate teamwork during the execution of an improvement project. | ○ | ○ | ○ | ○ | ○ |
| S4. I have the ability to positively influence team members. | ○ | ○ | ○ | ○ | ○ |
| S5. I have the ability to manage interpersonal conflicts. | ○ | ○ | ○ | ○ | ○ |
| S6. I have the ability to encourage the team to speak, question and propose ideas for improvement. | ○ | ○ | ○ | ○ | ○ |
| S7. I have the ability to communicate openly with the team to resolve problems in difficult situations. | ○ | ○ | ○ | ○ | ○ |

Analysis Guidelines

**Scale (1–5)** – 1 = Strongly Disagree; 2 = Disagree; 3 = Neither Agree nor Disagree; 4 = Agree; 5 = Strongly Agree.

**How to Calculate (Step by Step)**

· For each dimension, add the scores for the items answered.

· Divide by the number of items answered in that dimension.

· Apply the completeness rule: calculate the average only if ≥ 80% of the items in the dimension were answered.

· (Optional) Calculate the overall average as the average of the valid dimensions.

**Suggested Interpretation**

· < 3.0: Development Required

· 3.0–3.9: Intermediate

· ≥ 4.0: Good Perceived Mastery

**Subgroups**

· Also calculate the averages by item subgroup (map below) to identify areas for development.

**Reverse Items**

· There are no reverse items in this version.

**Missing Data**

· Avoid imputation. Calculate the mean using available items, as long as they represent ≥ 80% of the dimension.

**Reports**

· Presents means (overall, by dimension, and by subgroup), 95% CI when applicable, and compares strata (team, profession, sector) with appropriate tests.

Dimension Subgroups (Item Map)

**Section 1 — Attitudes about Quality Improvement**

• A1–A4: General attitudes about the value and role of improvement.

**Section 2 — Technical Skills in Quality Improvement**

• T1–T2: Identifying and prioritizing opportunities.

• T3–T4, T14: Cause and process analysis.

• T5–T7, T13, T15–T16: Measurement, indicators, and stratification.

• T8–T9: Planning and defining goals/interventions.

• T10–T12: Testing, implementation, and dissemination.

• T17–T19: Variance analysis (run/control charts).

**Section 3 — Soft skills**

• S1–S2: Team building.

• S3–S4: Facilitation and influence.

• S5–S7: Conflict, psychological safety, and communication.

Brief Technical Glossary

· **Quality Improvement (QI)**: A systematic approach to reducing unwanted variation and increasing the fulfillment of user needs and expectations in healthcare.

· **Criterion vs. Indicator**: The criterion describes the standard; the indicator quantifies performance against the standard.

· **Stratification**: Separating results by subgroups (unit, shift, risk, etc.) to identify areas for improvement.

· **Baseline**: Initial performance before changes (sufficient historical data for comparison).

· **Goal (SMART)**: Specific, measurable, achievable, relevant, time-bound.

· **Multifaceted Intervention**: A coordinated set of actions (people, processes, technology) to change the system.

· **Common vs. Special Variation**: Intrinsic process fluctuation vs. change due to a specific, identifiable cause.

· **Run Chart/Control Chart**: Time-series tools for detecting signs of change and stability. Psychological safety: the ability to speak up, ask questions, and suggest improvements without fear of retaliation.

· **Spread**: the deliberate expansion of a validated improvement to other similar contexts.

Metadata and Citation

QualiComp v1.0 — 2025-10-09 | PT-BR | Non-commercial academic use with citation | Contact: eliane.pereira@ufrn.br / zenewton.gama@ufrn.br | Cite with Silva, E. P. da, Freitas, M. R. de, & Gama, Z. A. da S. (2025). Health professionals’ competencies in quality improvement:

QualiComp Questionnaire [Unpublished questionnaire].
